# Supplementary material
Source: PubMed Central journal article supplement (PMC1941497)
Supplement: pnas_0703310104_4.pdf [file pnas_0703310104_4.pdf]

Table 1. Strains and plasmids used in this study

| Strains or plasmids            | Relevant characteristics                                                                                           | References |
|--------------------------------|--------------------------------------------------------------------------------------------------------------------|------------|
| <u>MC4100 and derivatives:</u> |                                                                                                                    |            |
| MC4100                         | F- <i>araD139</i> $\Delta(\textit{argF-lac})$ U169 <i>rpsL150(strR)</i><br><i>relA1 fibB5301 deoC1 ptsF25 rbsB</i> | 1          |
| MHR261                         | <i>csgB</i>                                                                                                        | 2          |
| MHR442                         | <i>csgBF</i>                                                                                                       | 3          |
| MHR592                         | <i>csgF</i>                                                                                                        | 3          |
| LSR10                          | $\Delta\textit{csgA}$                                                                                              | 3          |
| LSR13                          | $\Delta\textit{csgBA}$                                                                                             | This study |
| NDH108                         | <i>csgF</i> $\Delta\textit{csgBA}$                                                                                 | This study |
| <u>C600 and derivatives:</u>   |                                                                                                                    |            |
| C600                           | F- <i>thr leu thi lac tonA</i>                                                                                     | 4          |
| LSR6                           | $\Delta\textit{csg}::\text{KanR}$                                                                                  | 3          |
| LSR12                          | $\Delta\textit{csgDEFG}$ $\Delta\textit{csgBA}$                                                                    | This study |
| <u>Plasmids:</u>               |                                                                                                                    |            |
| pTrc99A                        | Expression vector                                                                                                  | Pharmacia  |
| pMC1                           | <i>csgG</i> cloned into pTrc99A                                                                                    | 3          |
| pMC3                           | His-tagged <i>csgA</i> cloned into the IPTG<br>inducible plasmid pHL3                                              | 3          |
| pCsgF                          | His-tagged <i>csgF</i> cloned into pTrc99A                                                                         | This study |
| pNH2                           | His-tagged <i>csgB<sub>trunc</sub></i> cloned into pMC3                                                            | This study |
| pNH3                           | Empty expression vector                                                                                            | This study |

|      |                                                   |            |
|------|---------------------------------------------------|------------|
| pNH4 | His tagged <i>csgB</i> cloned into pMC3           | This study |
| pLR2 | Empty vector containing the <i>csgBA</i> promoter | 5          |
| pLR8 | <i>csgB</i> cloned into pLR2                      | This study |
| pNH1 | <i>csgB<sub>trunc</sub></i> cloned into pLR2      | This study |

1. Casadaban, M.J. (1976) *J Mol Biol* **104**, 541-55.
2. Hammar, M., Bian, Z., & Normark, S. (1996) *Proc Natl Acad Sci U S A* **93**, 6562-6566.
3. Chapman, M. R., Robinson, L. S., Pinkner, J. S., Roth, R., Heuser, J., Hammar, M., Normark, S., & Hultgren, S. J. (2002) *Science* **295**, 851-855.
4. Campbell, A. (1961) *Virology* **14**, 22-32.
5. Robinson, L. S., Ashman, E. M., Hultgren, S. J., & Chapman, M. R. (2006) *Mol Microbiol* **59**, 870-881.
