# Supplementary material
Source: PubMed Central journal article supplement (PMC1941497)
Supplement: pnas_0703310104_5.pdf [file pnas_0703310104_5.pdf]

Table 2. Primers used in this study.

| Primer name                | Primer sequence                                                                |
|----------------------------|--------------------------------------------------------------------------------|
| CsgB <sub>trunc</sub> CF   | 5'-GCGCCATGGGGAAAAACAAATTGTTATTTATG-3'                                         |
| CsgB <sub>trunc</sub> CR   | 5'-GCGGGATCCTTATTGAGTACCATACTGTGTAATATT-3'                                     |
| CsgBFor                    | 5'-GCGCATATGAAAAACAAATTGTTATTTATGATG-3'                                        |
| CsgB <sub>trunc</sub> Rhis | 5'-GCGGAATTCTTAGTGATGGTGATGGTGATGTTGAGTACCATACTG TGT AAT ATT-3'                |
| WTCsgBFor                  | 5'- GCGGAGCTCATATGAAAAACAAATTGTTATTTATGATG -3'                                 |
| WTCsgBRhis                 | 5'- GCGCTGCAGAATTCTTAGTGATGGTGATGGTGATGA CGT TGT GTC ACGCG -3'                 |
| CsgBAREDP1                 | 5'-AATTTCTTAAATGTACGACCAGGTCCAGGGTGACAACATGAAAAACGTGTGTAGGC<br>TGGAGCTGCTTC-3' |
| CsgAREDP2                  | 5'-GGGCTTGCGCCCTGTTTCTGTAATACAAATGATGTATTAGTACTGCATATGAATATC<br>CTCCTT AG-3'   |
