# Supplementary material
Source: PubMed Central journal article supplement (PMC1941497)

**A**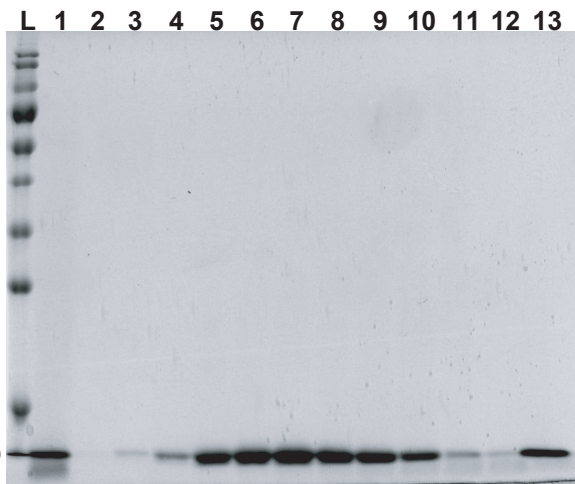**B**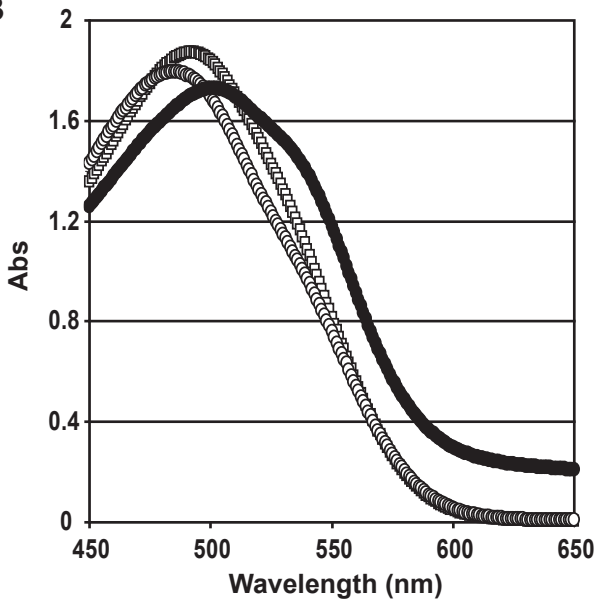

Supplement: pnas_0703310104_1.pdf [file pnas_0703310104_1.pdf]

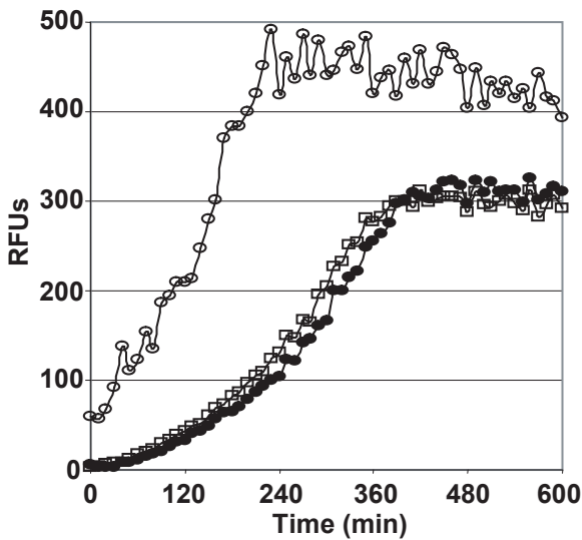

Supplement: pnas_0703310104_2.pdf [file pnas_0703310104_2.pdf]

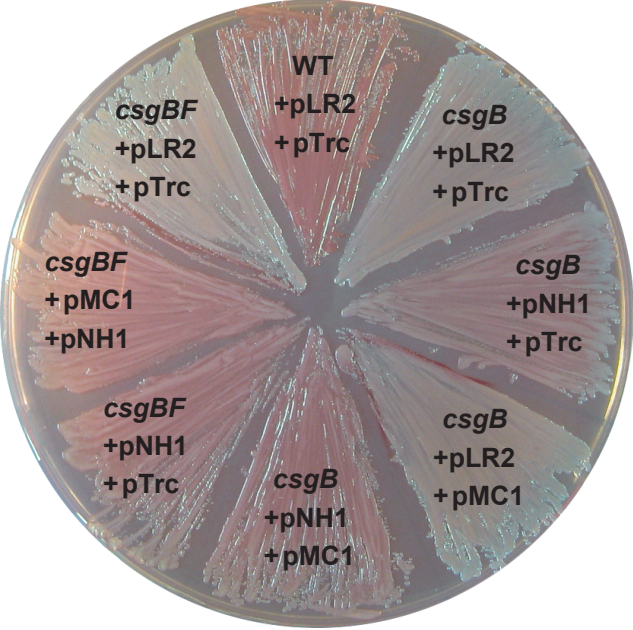

Supplement: pnas_0703310104_3.pdf [file pnas_0703310104_3.pdf]
